# Supplementary material for: Investigating ecosystem connections in the shelf sea environment using complex networks
Source: Copernicus journal article supplement (doi:10.5194/bg-21-731-2024), 2024-02-08

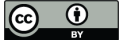

*Supplement of*

## **Investigating ecosystem connections in the shelf sea environment using complex networks**

**Ieuan Higgs et al.**

*Correspondence to:* Ieuan Higgs (i.higgs@pgr.reading.ac.uk)

The copyright of individual parts of the supplement might differ from the article licence.

Figure S1

A set of box plots for key indicator variables, describing the distribution of unprocessed model output values across the entire time series of each region (A-M) shown in Fig.7 of the main text.

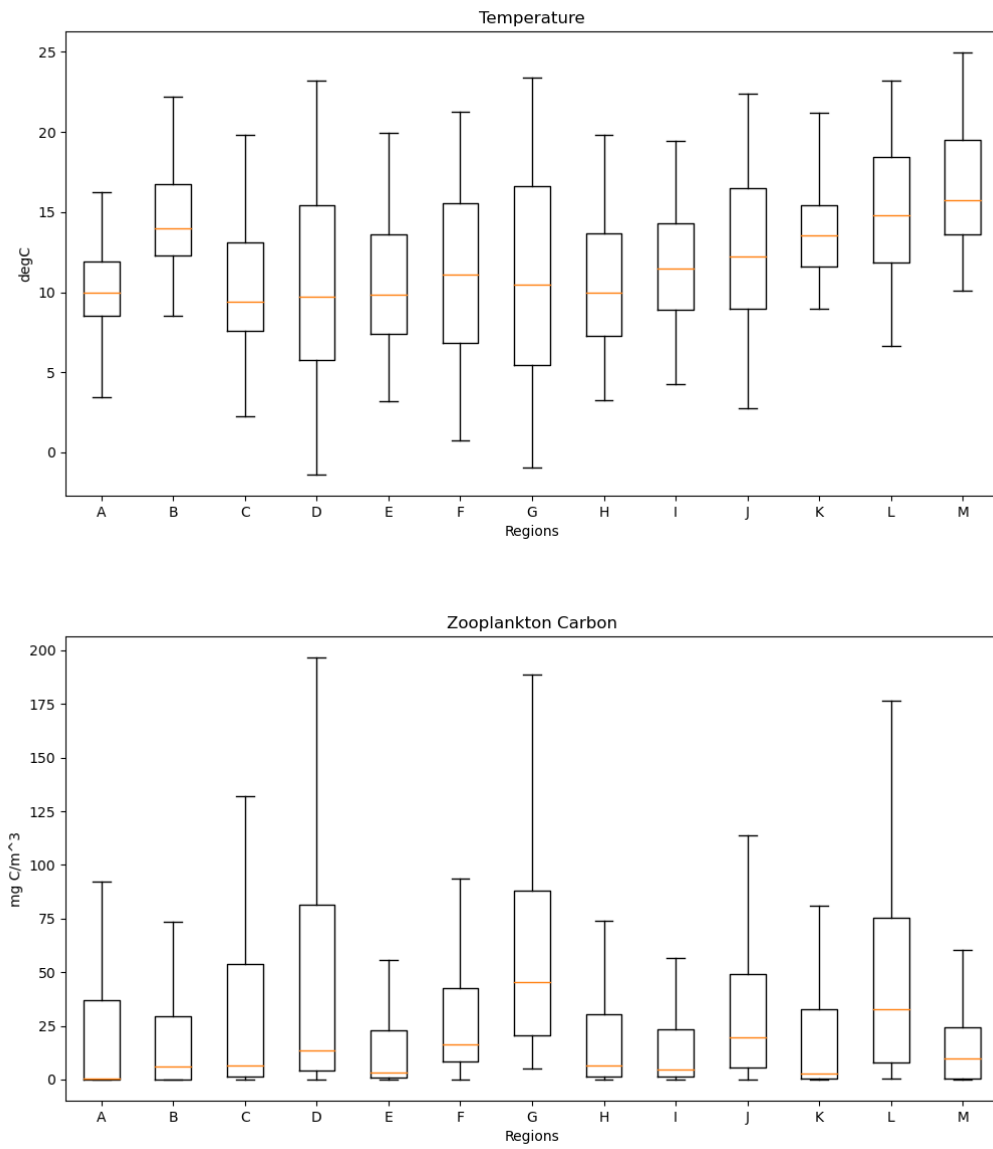

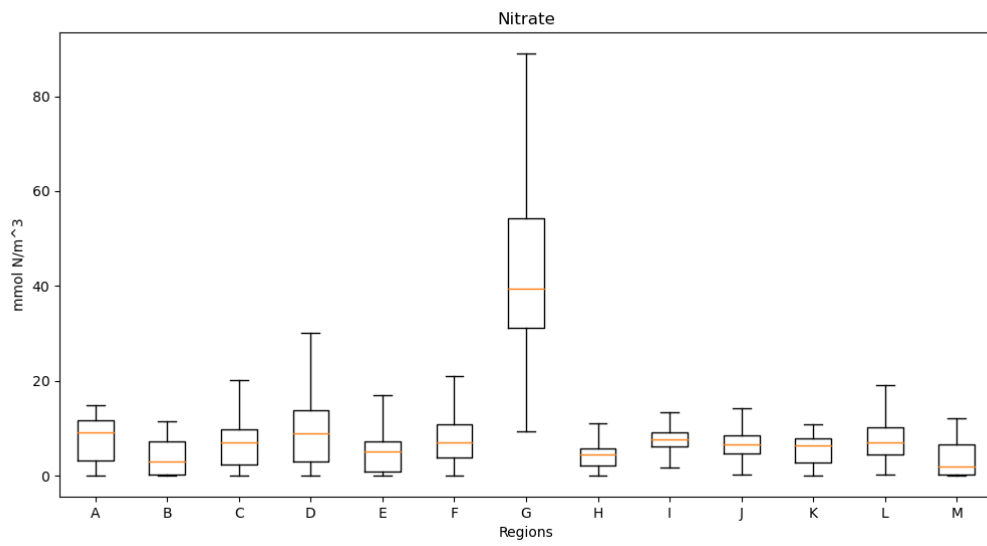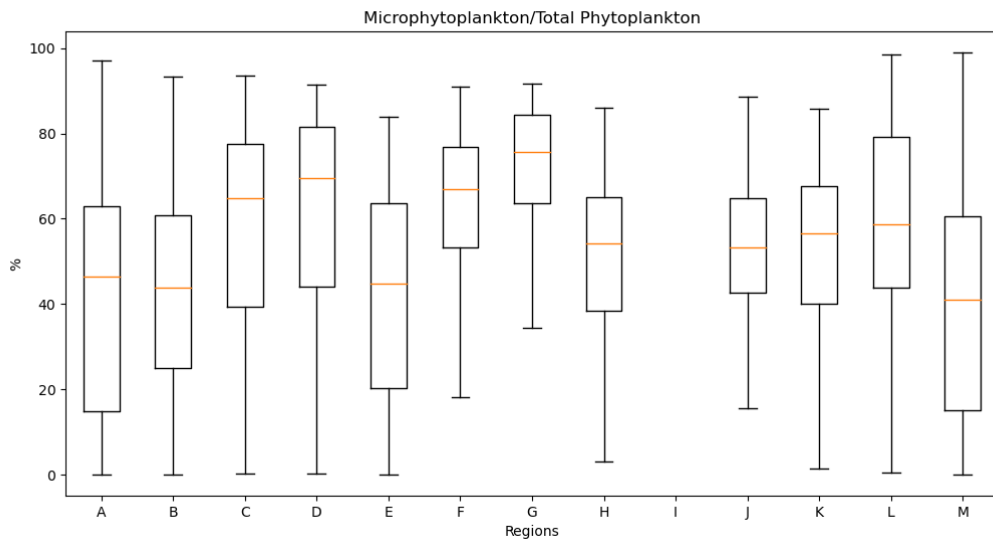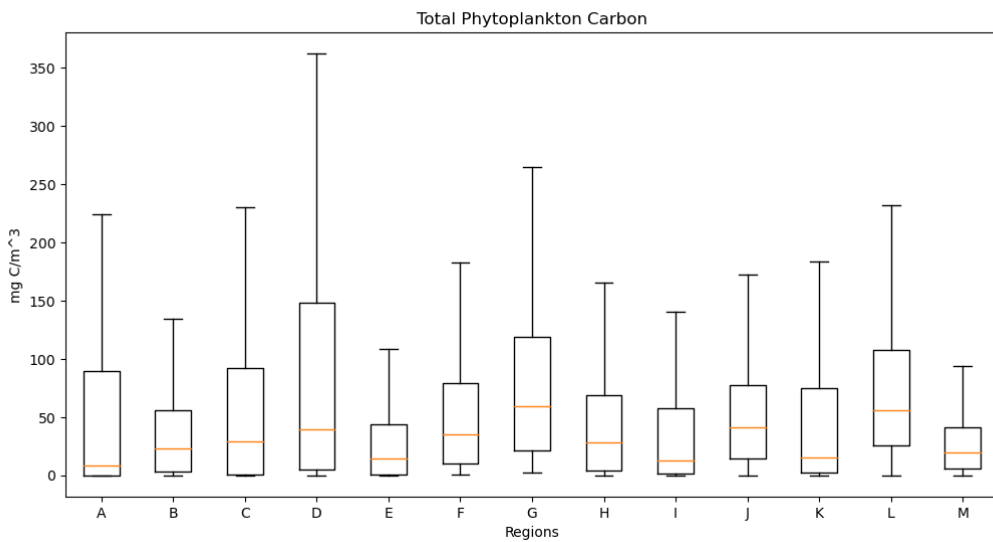

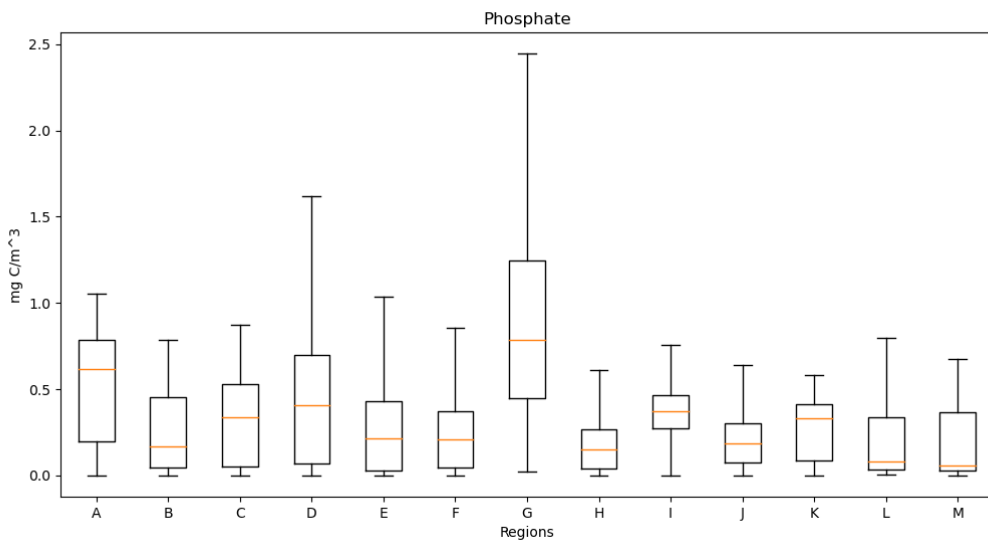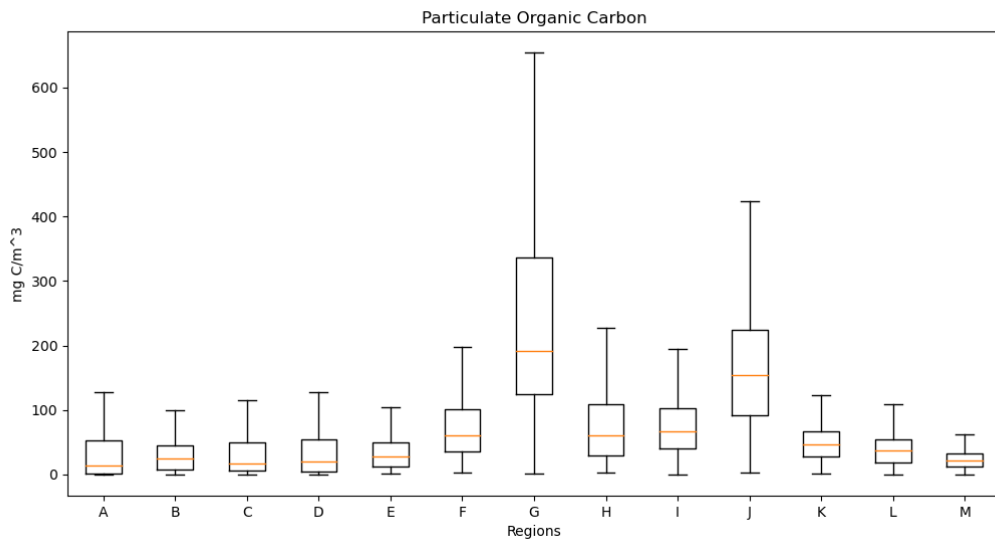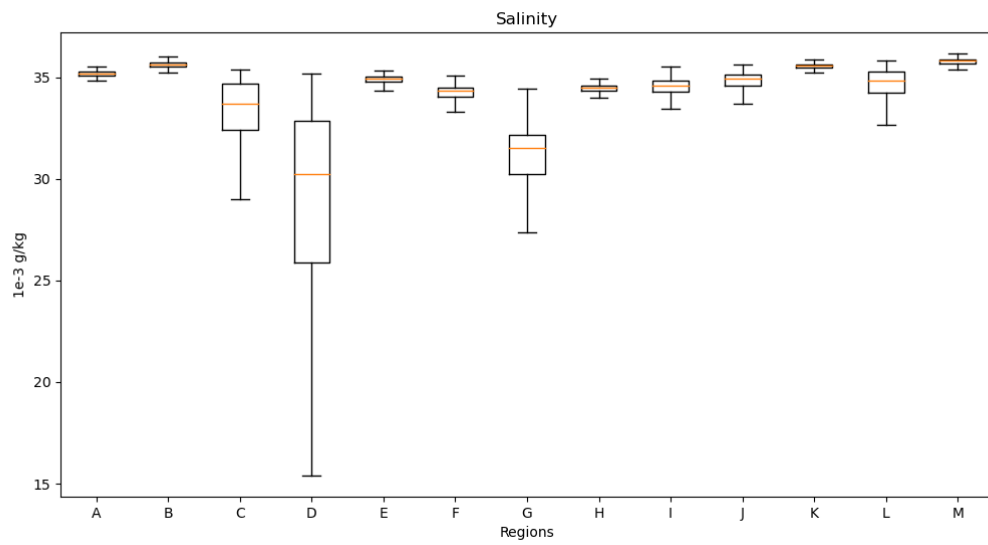

Figure S2

A comparison of unfiltered (blue) and filtered (red) timeseries over a 100-day period (April 10 – July 18), at the surface during the phytoplankton bloom in 2016. The filtered removes seasonality effectively – making the signal sensitive to the time-local behaviour.

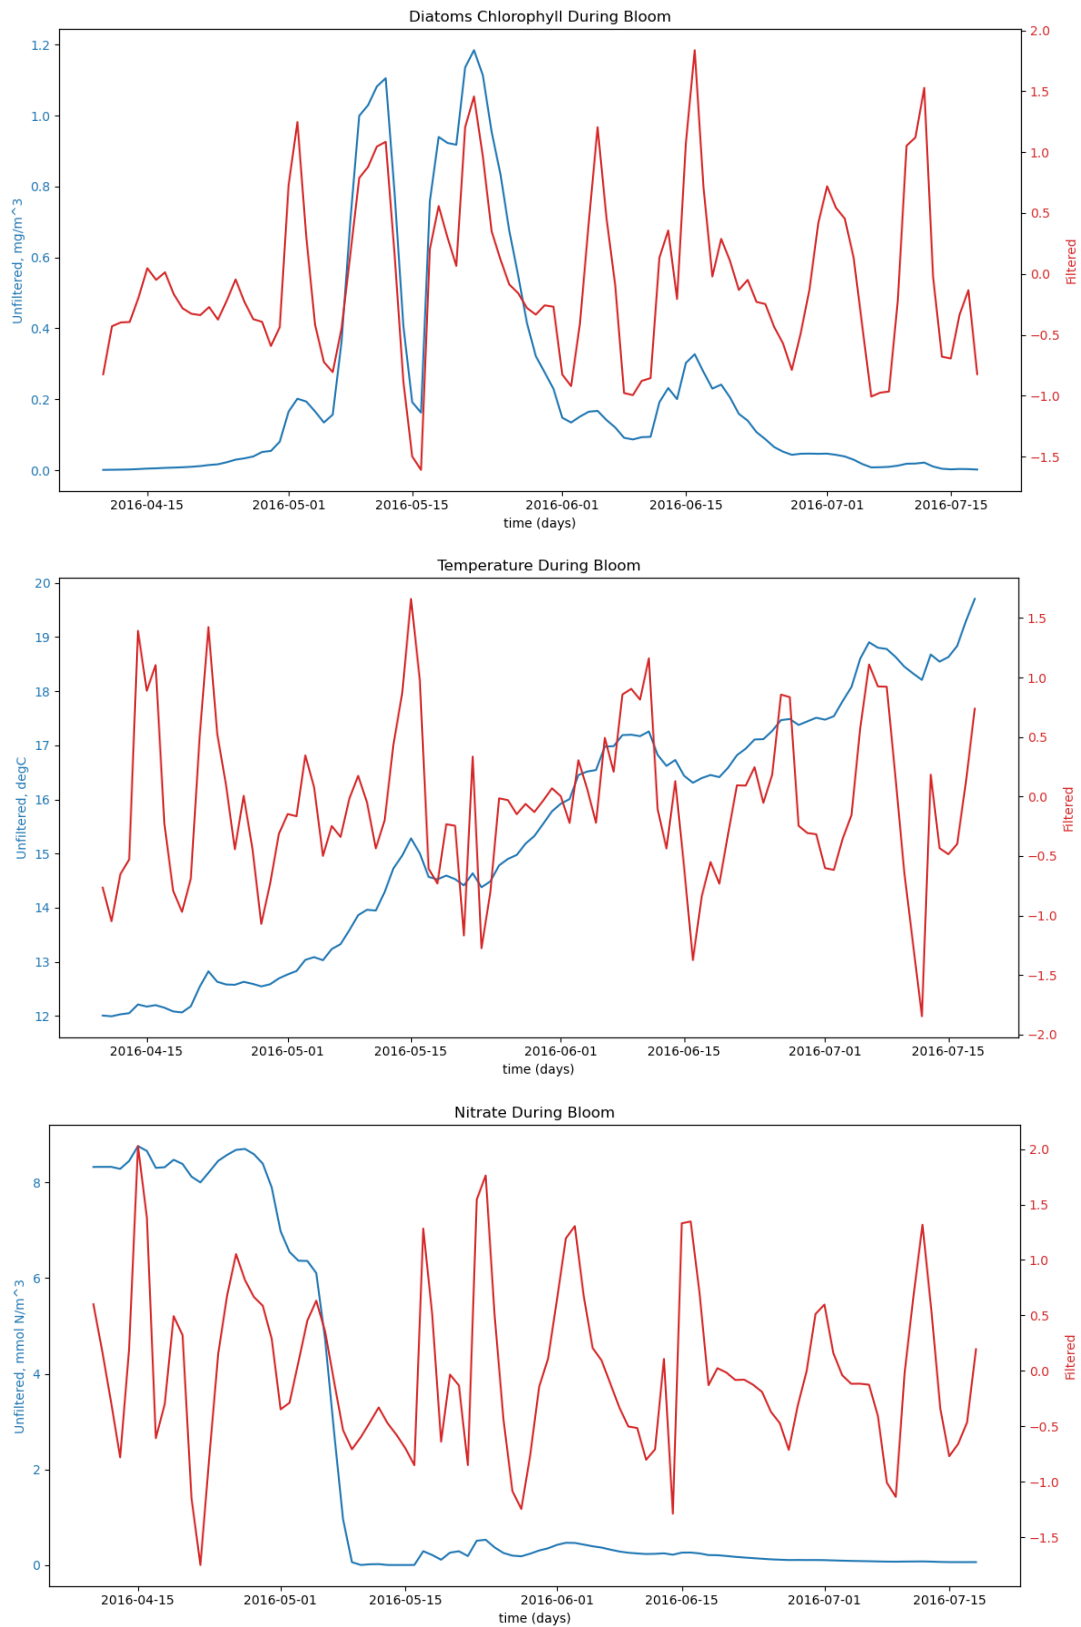

Supplement: Supplementary file 1 [file bg-21-731-2024-supplement.pdf]
